# Supplementary material for: Incremental Benefit-Cost of MOMCare: Collaborative Care for Perinatal Depression Among Economically Disadvantaged Women
Source: Atypon-hosted journal article supplement (doi:10.1176/appi.ps.201600411), 2017-07-03
Supplement: appi.ps.201600411.ds001.pdf [file appi.ps.201600411.ds001.pdf]

## Supplement 1: Sensitivity Analysis

Our sensitivity analysis used six multiply imputed datasets for the 12 women who were missing cost data. We then calculated the multiple imputed version of the gamma regression analyses. Group differences were statistically significant in all the six imputations and the pooled analyses in both those with and without PTSD. Pooled gamma regression results for women with MDD and without PTSD in the multiply imputed analysis showed significant group effects. Regression analyses for those with MDD but without PTSD showed a significant group effect (Wald's chi square = 31.09,  $p < .0001$ ), with imputed means of \$1,692 (95% CI = \$1,390, \$1,995) for the MOMCare group and an imputed mean of \$684 (95% CI = \$508, \$859) for the MSS-Plus group. For the women with both MDD and PTSD, the multiply imputed gamma regression showed a significant group effect (Wald's chi square = 15.98,  $p < .0001$ ), with imputed means of \$2,162 (95% CI = \$1,691, \$2,574) for the MOMCare group and \$1,070 (95% CI = \$790, \$1,349) for those in the MSS-Plus group.
