# Supplementary material for: Incremental Benefit-Cost of MOMCare: Collaborative Care for Perinatal Depression Among Economically Disadvantaged Women
Source: Atypon-hosted journal article supplement (doi:10.1176/appi.ps.201600411), 2017-07-03
Supplement: appi.ps.201600411.ds002.pdf [file appi.ps.201600411.ds002.pdf]

Supplement 2: Cost Study Flowchart

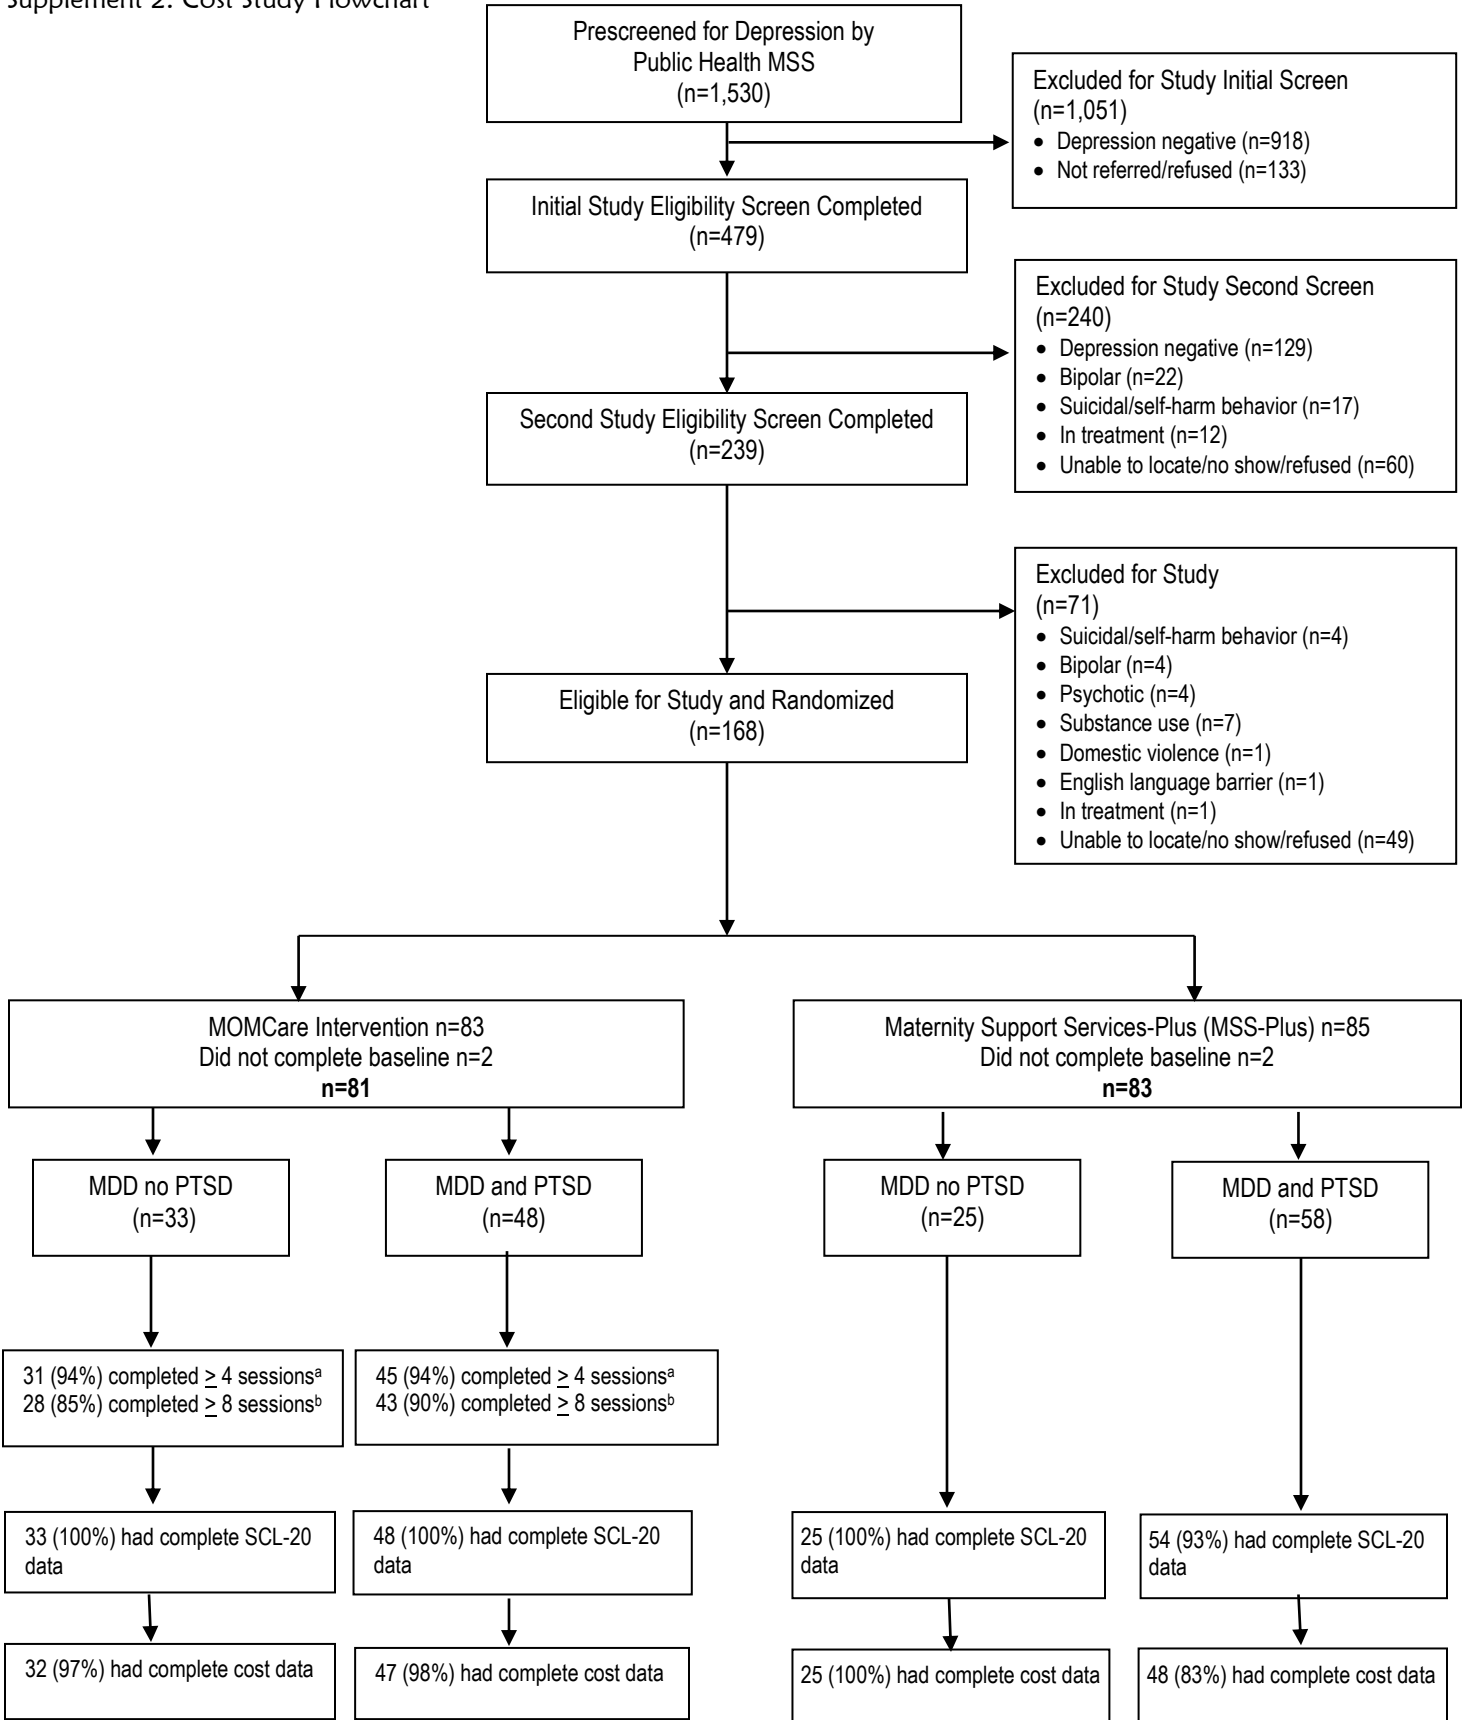

<sup>a</sup> ≥4 sessions = minimally adequate treatment

<sup>b</sup> ≥8 sessions = full dose of Brief Interpersonal Psychotherapy
